# Supplementary material
Source: PubMed Central journal article supplement (PMC5572925)
Supplement: 10.1074_M117.776195_jbc.M117.776195-1.pdf [file 10.1074_M117.776195_jbc.M117.776195-1.pdf]

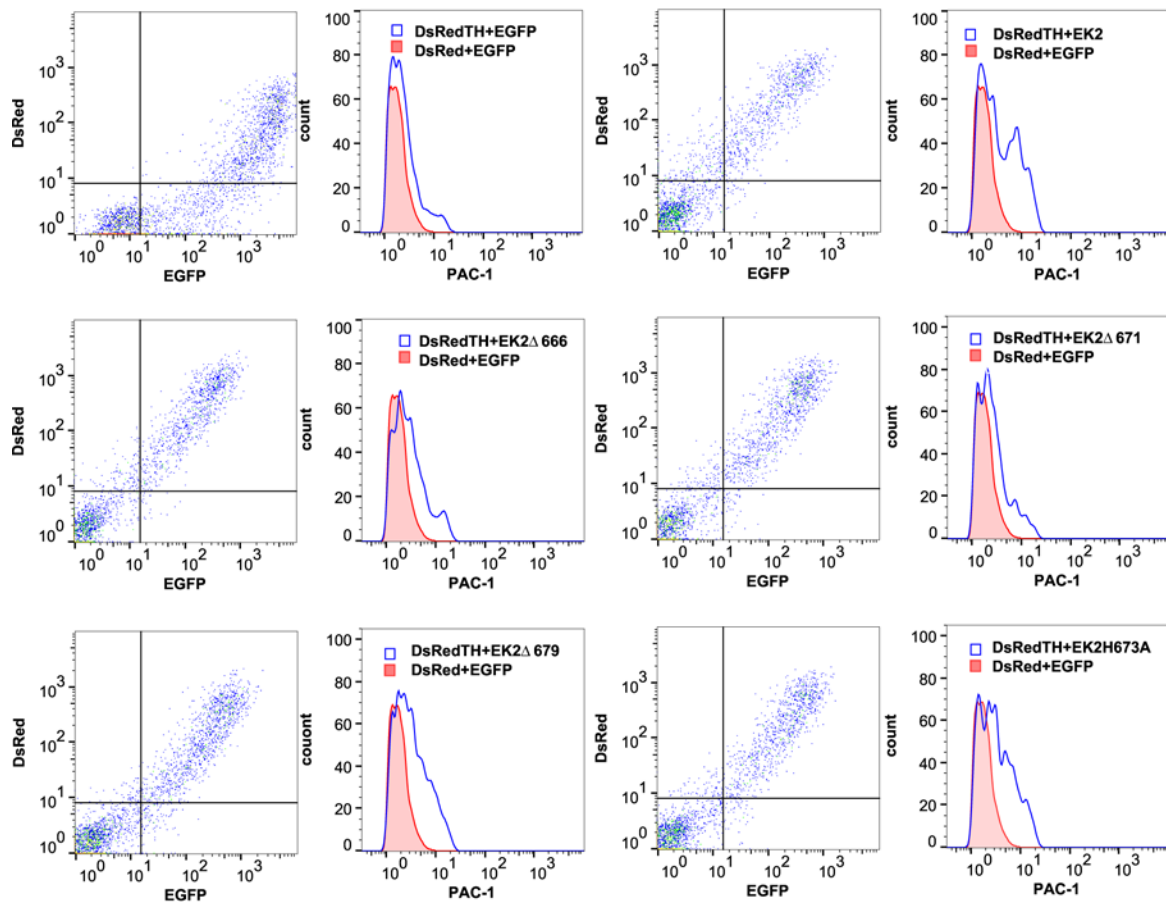

**FIGURE S1.** Integrin activation was measured using PAC-1 binding to  $\alpha$ IIb $\beta$ 3-CHO cells transiently expressing DsRed-fused talin-H and EGFP-fused K2 or its mutants and analyzed by flow cytometry. Each dot plot and resulting histogram is shown as a set of two panels for each construct. In each dot plot, the upper right quadrant is the cell population double-positive for DsRed and EGFP. Each histogram displays the PAC-1 binding to  $\alpha$ IIb $\beta$ 3-CHO cells double-positive for DsRed and EGFP.

**A**

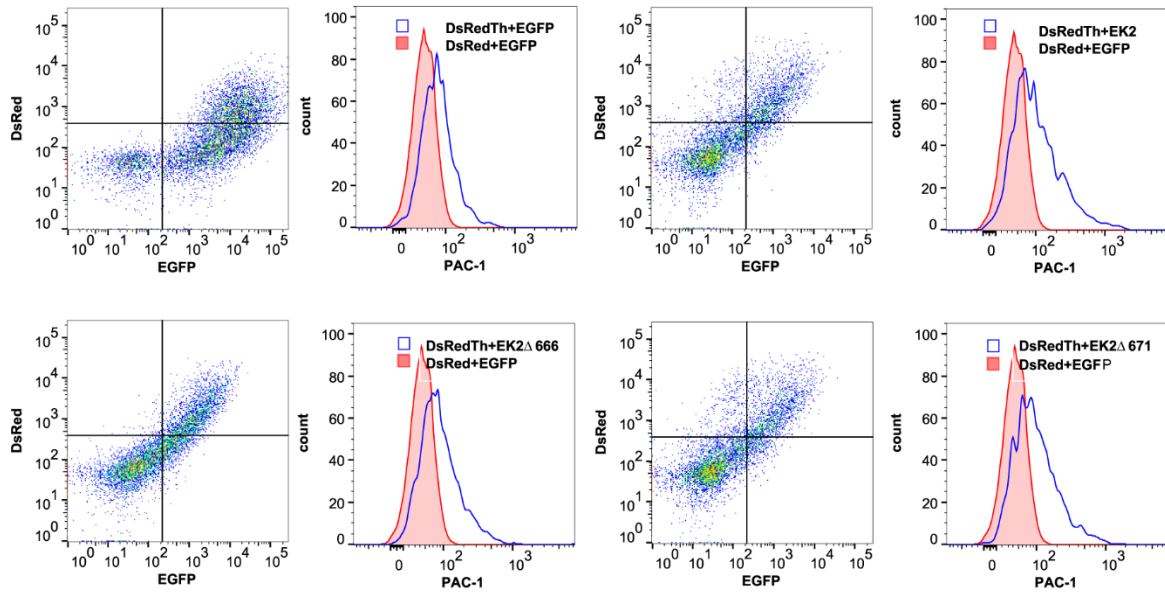

**B**

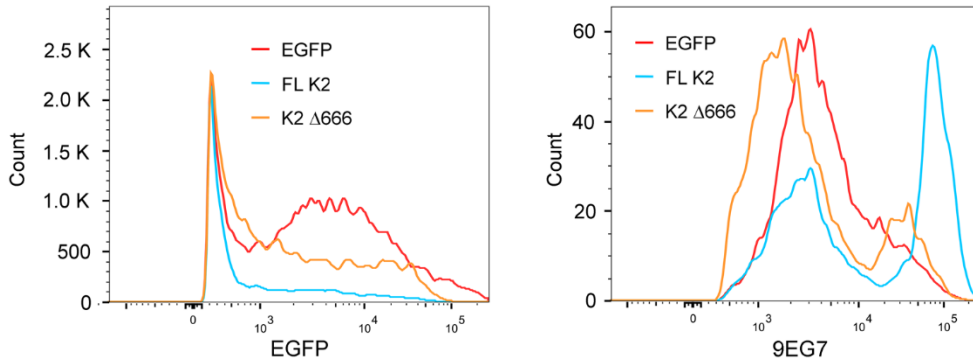

**FIGURE S2.** Integrin activation was measured using PAC-1 binding to HEL cells transiently expressing DsRed-fused talin-H and EGFP-fused K2 or its mutants (A). Each dot plot and resulting histogram is shown as a set of two panels for each construct. In each dot plot, the upper right quadrant is the cell population double-positive for DsRed and EGFP. Each histogram displays the PAC-1 binding to HEL cells double-positive for DsRed and EGFP. (B)  $\beta 1$  integrin activation was measured using mAb 9EG7 to RAW 264.7 cells transiently expressing EGFP alone or EGFP-K2 constructs. The EGFP positive cell population are shown in the right panel and histograms display the 9EG7 binding to RAW 264.7 cells positive for EGFP are in left panel.

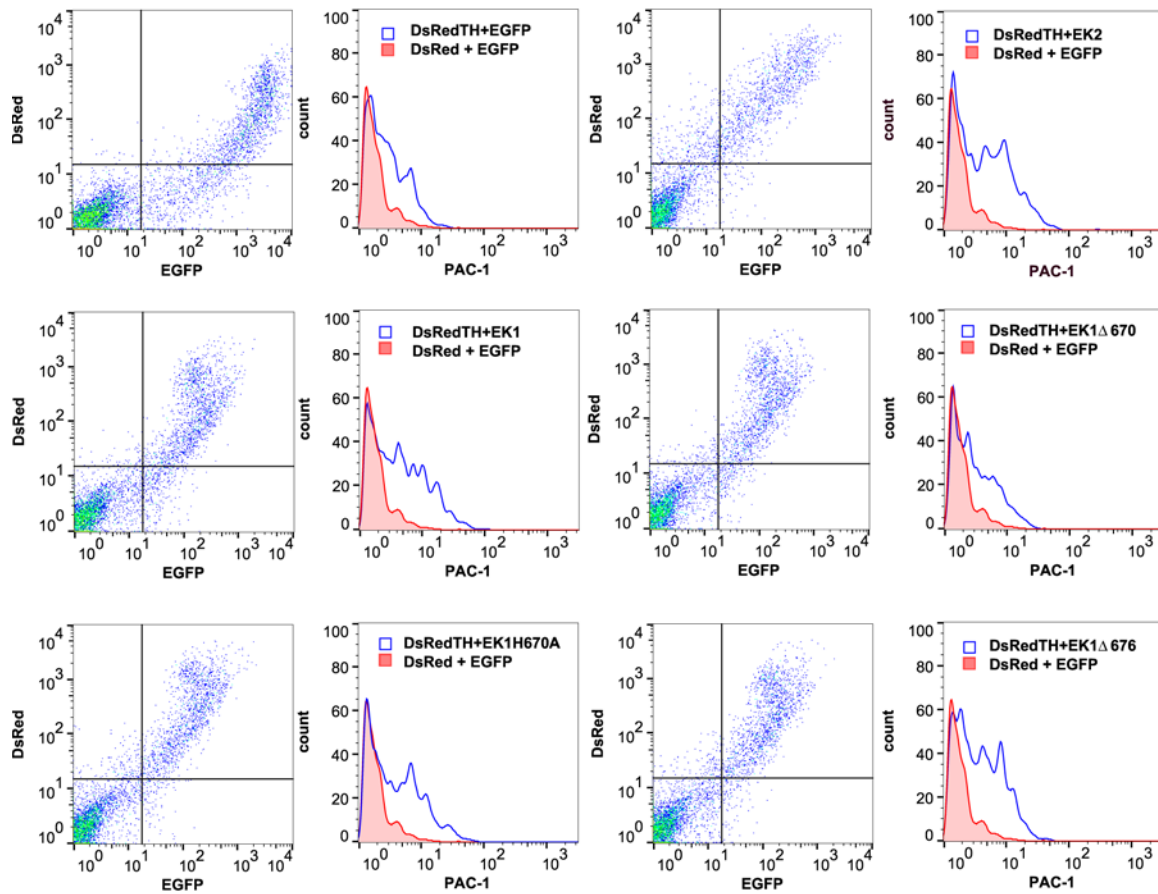

**FIGURE S3.** Integrin activation was measured using PAC-1 binding to  $\alpha$ IIb $\beta$ 3-CHO cells transiently expressing DsRed-fused talin-H and EGFP-fused K1, K2 or their mutants and analyzed by flow cytometry. Each dot plot and resulting histogram is shown as a set of two panels for each construct. In each dot plot, the upper right quadrant is the cell population double-positive for DsRed and EGFP. Each histogram displays the PAC-1 binding to  $\alpha$ IIb $\beta$ 3-CHO cells double-positive for DsRed and EGFP.

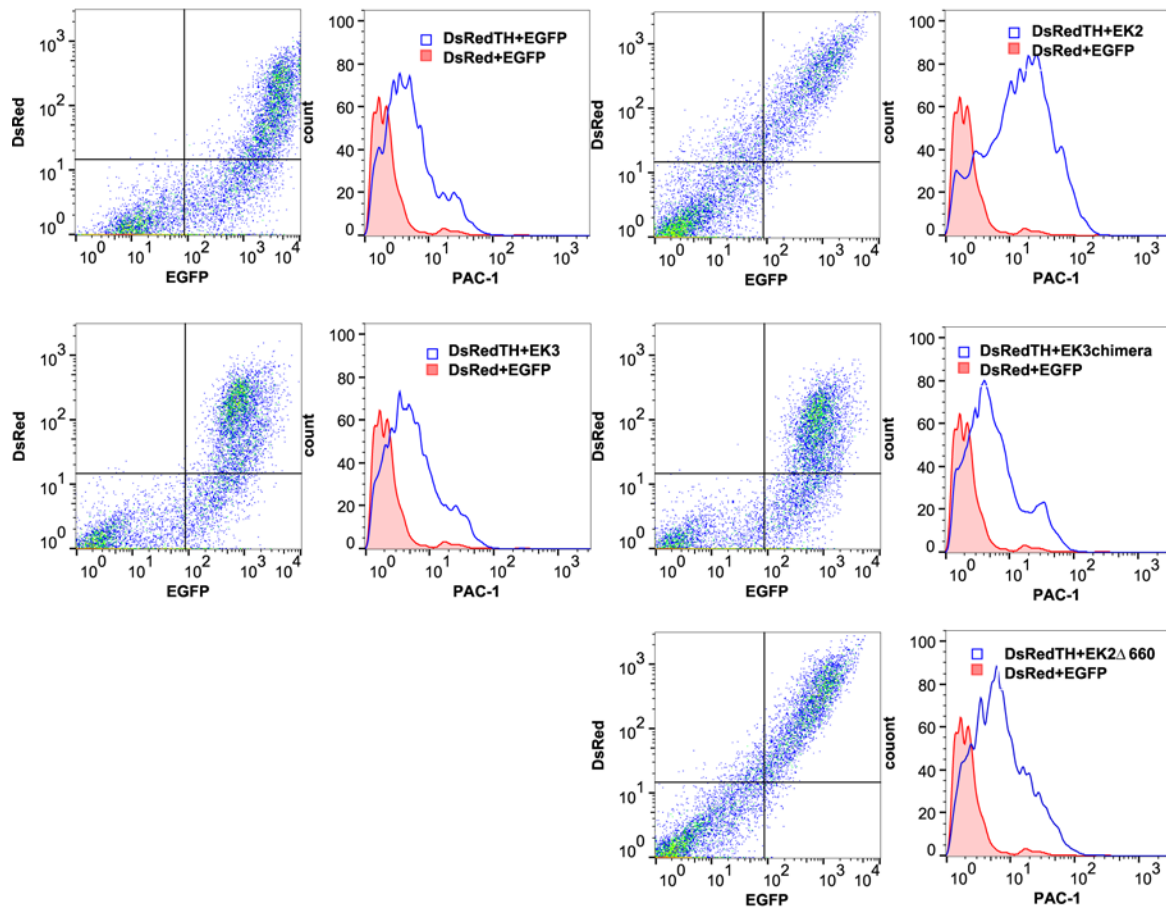

**FIGURE S4** Integrin activation was measured using PAC-1 binding to  $\alpha$ IIb $\beta$ 3-CHO cells transiently expressing DsRed-fused talin-H and EGFP-fused K2 K2, K3 or K3 chimera (detailed in text and legend to Fig. 4). Each dot plot and resulting histogram is shown as a set of two panels for each construct. In each dot plot, the upper right quadrant is the cell population double-positive for DsRed and EGFP. Each histogram displays the PAC-1 binding to  $\alpha$ IIb $\beta$ 3-CHO cells double-positive for DsRed and EGFP.
